# Supplementary material
Source: ML conference proceedings conference paper supplement (https://proceedings.neurips.cc/paper_files/paper/2015/hash/285ab9448d2751ee57ece7f762c39095-Abstract.html)
Supplement: Supplementary file [file 285ab9448d2751ee57ece7f762c39095-Supplemental.zip]

---

# GP Kernels for Cross-Spectrum Analysis Supplemental Material

---

<sup>1</sup>Kyle Ulrich, <sup>3</sup>David E. Carlson, <sup>2</sup>Kafui Dzirasa, <sup>1</sup>Lawrence Carin

<sup>1</sup>Department of Electrical and Computer Engineering, Duke University

<sup>2</sup>Department of Psychiatry and Behavioral Sciences, Duke University

<sup>3</sup>Department of Statistics, Columbia University

{kyle.ulrich, kafui.dzirasa, lcarin}@duke.edu

david.edwin.carlson@gmail.com

## A Kernel Derivations

In this section, we detail derivations of the SG, SM, and CSM kernels by the method of the auto-covariance of periodic functions with unknown frequency.

### A.1 The Spectral Gaussian (SG) Kernel

Consider a periodic signal  $f(x) = \sqrt{2} \cos(\omega(x + \phi))$  with the prior  $\omega \sim \mathcal{N}(\mu, \nu)$  on the angular frequency. Letting  $\theta = \{\mu, \nu\}$ , the stationary, positive definite auto-covariance function for  $f(x)$  is derived according to

$$\begin{aligned}
 k_{\text{SG}}(\tau; \theta) &\triangleq \text{cov}(f(x), f(x + \tau)) \\
 &= \mathbb{E} [2 \cos(\omega(x + \phi)) \cos(\omega(x + \phi + \tau))] \\
 &= \mathbb{E} [\cos(\omega\tau) - \cos(\omega(2x + 2\phi + \tau))] \\
 &= \mathbb{E}_{p(\omega)} [\cos(\omega\tau)] \\
 &= \int_{-\infty}^{\infty} \cos(\omega\tau) \frac{1}{\sqrt{2\pi\nu}} \exp\left(-\frac{1}{2\nu}(\omega - \mu)^2\right) d\omega \tag{1} \\
 &= \frac{1}{\sqrt{2\pi\nu}} \text{Re} \left\{ \int_{-\infty}^{\infty} \exp\left(j\omega\tau - \frac{1}{2\nu}(\omega - \mu)^2\right) d\omega \right\}
 \end{aligned}$$

Let  $a = \frac{1}{2\nu}$ ,  $b = -\frac{1}{2}\left(j\tau + \frac{\mu}{\nu}\right)$ , and  $c = -\frac{\nu^2}{2}$ , then

$$\begin{aligned}
 &= \frac{1}{\sqrt{2\pi\nu}} \text{Re} \left\{ \int_{-\infty}^{\infty} \exp(-a\omega^2 - 2b\omega + c) d\omega \right\} \\
 &= \frac{1}{\sqrt{2\pi\nu}} \text{Re} \left\{ \sqrt{\frac{\pi}{a}} \exp\left(\frac{b^2}{a} + c\right) \right\} \\
 &= \text{Re} \left\{ \exp\left(j\mu\tau - \frac{1}{2}\nu\tau^2\right) \right\} \\
 &= \exp\left(-\frac{1}{2}\nu\tau^2\right) \cos(\mu\tau). \tag{2}
 \end{aligned}$$

This results in an interpretable auto-covariance function, where  $\mu$  represents the primary frequency and the variance  $\nu$  controls how quickly this frequency dependency decays with  $\tau$ . Used as a stationary kernel in a Gaussian process, the SG kernel discovers a single Gaussian component in the spectral density.

## A.2 The Spectral Mixture (SM) Kernel

Consider a periodic signal  $f(\mathbf{x}) = \sum_{q=1}^Q \sqrt{2a_q} \cos(\boldsymbol{\omega}_q^T (\mathbf{x} + \boldsymbol{\phi}_q))$ , where  $Q$  latent functions are superimposed, each with unique input-space offset  $\boldsymbol{\phi}_q \in \mathbb{R}^P$  and angular frequency vector  $\boldsymbol{\omega}_q \in \mathbb{R}^P$ . Each angular frequency component is assigned the prior  $\boldsymbol{\omega}_q^{(p)} \sim \mathcal{N}(\mu_q^{(p)}, \nu_q^{(p)})$ . Letting  $\boldsymbol{\theta} = \{\boldsymbol{\mu}_q, \boldsymbol{\nu}_q\}_{q=1}^Q$  and  $p(\boldsymbol{\Omega}) = \prod_q \prod_p p(\boldsymbol{\omega}_q^{(p)})$ , the auto-covariance function for  $f(\mathbf{x})$  is derived according to

$$\begin{aligned} k_{\text{SM}}(\boldsymbol{\tau}; \boldsymbol{\theta}) &= \text{cov}(f(\mathbf{x}), f(\mathbf{x} + \boldsymbol{\tau})) \\ &= \mathbb{E} \left[ 2 \sum_{q=1}^Q \sum_{r=1}^Q \sqrt{a_q a_r} \cos(\boldsymbol{\omega}_q^T (\mathbf{x} + \boldsymbol{\phi}_q)) \cos(\boldsymbol{\omega}_r^T (\mathbf{x} + \boldsymbol{\phi}_r + \boldsymbol{\tau})) \right] \\ &= \sum_{q=1}^Q a_q \mathbb{E}_{p(\boldsymbol{\Omega})} [\cos(\boldsymbol{\omega}_q^T \boldsymbol{\tau})], \end{aligned}$$

where the expectation over the input domain eliminates cross terms between all  $q \neq r$  since each  $\boldsymbol{\omega}_q^{(p)} \neq \boldsymbol{\omega}_r^{(p)}$  with probability 1. Proceeding in the same fashion as the SG kernel,

$$\begin{aligned} k_{\text{SM}}(\boldsymbol{\tau}; \boldsymbol{\theta}) &= \sum_{q=1}^Q a_q \int_{-\infty}^{\infty} \cos(\boldsymbol{\omega}^T \boldsymbol{\tau}) \prod_{p=1}^P \frac{1}{\sqrt{2\pi\nu_q^{(p)}}} \exp\left(-\frac{1}{2\nu_q^{(p)}}(\omega_q^{(p)} - \mu_q^{(p)})^2\right) d\boldsymbol{\omega} \\ &= \sum_{q=1}^Q a_q \prod_{p=1}^P \frac{1}{\sqrt{2\pi\nu_q^{(p)}}} \text{Re} \left\{ \int_{-\infty}^{\infty} \exp\left(j\omega_q^{(p)}\tau_p - \frac{1}{2\nu_q^{(p)}}(\omega_q^{(p)} - \mu_q^{(p)})^2\right) d\omega_q^{(p)} \right\} \\ &= \sum_{q=1}^Q a_q \prod_{p=1}^P \exp\left(-\frac{1}{2}\nu_q^{(p)}\tau_p^2\right) \cos(\mu_q^{(p)}\tau_p) \end{aligned} \quad (3)$$

where the final step proceeds by recognizing that each integral in the product is an SG component from (1). This is known as the spectral mixture (SM) kernel.

## A.3 The Cross-Spectral Mixture (CSM) Kernel

We now consider  $C$  different channels and allow observations from each channel  $\{f_c(\mathbf{x})\}_{c=1}^C$  to be represented as a linear combination of latent signals,  $f_c(\mathbf{x}) = \sum_{q=1}^Q \sqrt{2a_{cq}} \cos(\boldsymbol{\omega}_q^T (\mathbf{x} + \boldsymbol{\phi}_{cq}))$ . While the angular frequency components are still assigned the prior  $\boldsymbol{\omega}_q^{(p)} \sim \mathcal{N}(\mu_q^{(p)}, \nu_q^{(p)})$ , each channel is assigned channel-specific input-space shifts  $\boldsymbol{\phi}_{cq}$ . When computing the cross-covariance function, these shifts will not cancel when  $c_1 \neq c_2$ . The cross-covariance function is derived according to

$$\begin{aligned} k_{\text{CSM}}^{c_1, c_2}(\boldsymbol{\tau}; \boldsymbol{\theta}) &= \text{cov}(f_{c_1}(\mathbf{x}), f_{c_2}(\mathbf{x} + \boldsymbol{\tau})) \\ &= \mathbb{E} \left[ 2 \sum_{q=1}^Q \sum_{r=1}^Q \sqrt{a_{c_1q} a_{c_2r}} \cos(\boldsymbol{\omega}_q^T (\mathbf{x} + \boldsymbol{\phi}_{c_1q})) \cos(\boldsymbol{\omega}_r^T (\mathbf{x} + \boldsymbol{\phi}_{c_2r} + \boldsymbol{\tau})) \right] \\ &= \sum_{q=1}^Q \sqrt{a_{c_1q} a_{c_2q}} \mathbb{E}_{p(\boldsymbol{\Omega})} [\cos(\boldsymbol{\omega}_q^T \boldsymbol{\tau} + \boldsymbol{\phi}_{c_2q} - \boldsymbol{\phi}_{c_1q})] \\ &= \sum_{q=1}^Q \sqrt{a_{c_1q} a_{c_2q}} \prod_{p=1}^P \frac{1}{\sqrt{2\pi\nu_q^{(p)}}} \text{Re} \left\{ \int_{-\infty}^{\infty} \exp\left(j\omega_q^{(p)}\tau_p + j(\phi_{c_2q}^{(p)} - \phi_{c_1q}^{(p)}) - \frac{1}{2\nu_q^{(p)}}(\omega_q^{(p)} - \mu_q^{(p)})^2\right) d\omega_q^{(p)} \right\} \\ &= \sum_{q=1}^Q \sqrt{a_{c_1q} a_{c_2q}} \prod_{p=1}^P \exp\left(-\frac{1}{2}\nu_q^{(p)}\tau_p^2\right) \cos\left(\mu_q^{(p)}\left(\tau_p + \phi_{c_2q}^{(p)} - \phi_{c_1q}^{(p)}\right)\right), \end{aligned} \quad (4)$$

where the final step proceeds by recognizing that each integral in the product is simply an SG component from (1). The phase difference term  $\phi_{c_2q}^{(p)} - \phi_{c_1q}^{(p)}$  in this last step simply gets added to the constant  $c$  to produce the final result. We have termed this novel kernel the cross-spectral mixture (CSM) kernel.

## B DFT Approximation for the CSM Kernel

Here, we detail the derivation of Proposition 5.1 in the main paper.

### B.1 Circulant Matrix Approximation

Dropping cluster assignments and window indicators, the marginal likelihood variance in the paper was defined as  $\Gamma = \text{Re}\{\tilde{\Gamma}\}$  where  $\tilde{\Gamma} = \sum_q \mathbf{B}_q \otimes \mathbf{K}_q + \mathbf{H}^{-1} \otimes \mathbf{I}_N$  and  $\mathbf{K}_q = k_{\text{SG}}(\mathbf{x}, \mathbf{x}; \boldsymbol{\theta})$  for a set of input locations  $\mathbf{x}$ .

By definition, the covariance matrix  $\Sigma = \mathbf{K}_q$ , for any  $q$ , is a symmetric Toeplitz matrix. There are several properties of symmetric Toeplitz matrices that make the form of  $\tilde{\Gamma}$  particularly convenient. One of these properties is that a matrix of this form is uniquely identified by the first column of the matrix, denoted here as  $\boldsymbol{\sigma}$ . Furthermore, a symmetric Toeplitz matrix is closely related to a circulant matrix. Specifically, reflecting the first  $\lfloor \frac{N}{2} + 1 \rfloor$  elements of  $\boldsymbol{\sigma}$  to the last  $\lceil \frac{N}{2} + 1 \rceil$  elements will produce a circulant approximation,  $\tilde{\boldsymbol{\sigma}}$ , to  $\boldsymbol{\sigma}$ . The resulting matrix is also Toeplitz,  $\tilde{\Sigma} = \text{toeplitz}(\tilde{\boldsymbol{\sigma}})$ , and is closely related to the discrete Fourier transform (DFT) in the following way. Given the eigen-decomposition  $\tilde{\Sigma} = \mathbf{V}_{\tilde{\Sigma}} \boldsymbol{\Lambda}_{\tilde{\Sigma}} \mathbf{V}_{\tilde{\Sigma}}^{-1}$ , the vector of eigenvalues  $\boldsymbol{\lambda}_{\tilde{\Sigma}} = \text{diag}(\boldsymbol{\Lambda}_{\tilde{\Sigma}})$  equals the complex DFT of  $\tilde{\boldsymbol{\sigma}}$ . Mathematically,  $\mathbf{U}\tilde{\boldsymbol{\sigma}} = \boldsymbol{\lambda}_{\tilde{\Sigma}}$ , where  $\mathbf{U}$  is the  $N \times N$  unitary DFT matrix [?].

This reveals that the columns of  $\mathbf{U}$  are the eigenvectors of  $\tilde{\Sigma}$ , thereby implying that (a)  $\tilde{\Sigma}$  is diagonalizable by the DFT coefficient matrix, and (b) the elements along the diagonal,  $\boldsymbol{\lambda}_{\tilde{\Sigma}}$ , refer to the power spectral density of  $\tilde{\boldsymbol{\sigma}}$ , i.e.,

$$\mathbf{U}^\dagger \tilde{\Sigma} \mathbf{U} = \boldsymbol{\Lambda}_{\tilde{\Sigma}} = \text{diag}(\delta^{-1} S(\boldsymbol{\omega})), \quad (5)$$

where the spectral density values are scaled by  $\delta^{-1}$  and evaluated independently  $S(\boldsymbol{\omega}) = [S(\omega_1), \dots, S(\omega_N)]$  at angular frequency locations  $\boldsymbol{\omega} = \frac{2\pi}{N\delta} [0, 1, \dots, \lfloor \frac{N}{2} \rfloor, -\lfloor \frac{N-1}{2} \rfloor, \dots, -1]$ . Because of this, the full matrix  $\Sigma$  need not ever be stored; rather, the spectral density vector  $S(\boldsymbol{\omega})$  is sufficient.

As  $\delta \rightarrow 0$  and  $x_N \rightarrow \infty$ , this spectral density is exact and there is no error in approximating  $\Sigma$  with  $\tilde{\Sigma}$ . This is due to the increasing resolution of the DFT frequency bins. When the resolution is poor, however, the elements of  $\tilde{\Sigma}$  have small, but non-negligible, negative correlations.

### B.2 Marginal Likelihood of DFT Coefficients

The marginal likelihood formulation  $\mathbf{y} \sim \mathcal{N}(\mathbf{0}, \Gamma)$  is particularly useful if the DFT approximation from the previous section is applied. Specifically, the marginal likelihood of the linear transformations  $\{\mathbf{U}^\dagger \mathbf{y}_c\}_{c=1}^C$  is of interest. The following provides details about this distribution.

Although only the real portion of  $\mathbf{y} = \mathbf{y}^r + j\mathbf{y}^i$  is observed, the fact that  $\mathbf{y}^r$  is a sum of latent sinusoidal signals allows the complex vector  $\mathbf{y}$  to be represented as a circularly symmetric complex normal random variable, such that  $\mathbf{y} \sim \mathcal{CN}(\mathbf{0}, 2\tilde{\Gamma})$ . This formulation implies that the distribution of  $\mathbf{y}$  is invariant to any real phase shift in the underlying latent signals [?]. To avoid complex numbers, the joint distribution of the real and imaginary components of  $\mathbf{y}$  is equivalent to the multivariate Gaussian distribution,

$$\begin{bmatrix} \mathbf{y}^r \\ \mathbf{y}^i \end{bmatrix} \sim \mathcal{N} \left( \begin{bmatrix} \mathbf{0} \\ \mathbf{0} \end{bmatrix}, \begin{bmatrix} \text{Re}\{\tilde{\Gamma}\} & \text{Im}\{-\tilde{\Gamma}\} \\ \text{Im}\{\tilde{\Gamma}\} & \text{Re}\{\tilde{\Gamma}\} \end{bmatrix} \right), \quad (6)$$

where the marginal distribution for the real component is  $\mathbf{y}^r \sim \mathcal{N}(\mathbf{0}, \text{Re}\{\tilde{\Gamma}\})$ , the exact form given above.

Denoting the DFT of each channel as  $\mathbf{z} = (\mathbf{I}_C \otimes \mathbf{U})^\dagger \mathbf{y}$ , and using the circulant approximation for each matrix  $\{\mathbf{K}_q\}_{q=1}^Q$  along with (5) provides the equivalent marginal distribution for the DFT coefficients of  $\mathbf{z} \sim \mathcal{CN}(\mathbf{0}, 2\mathbf{S})$ , where

$$\begin{aligned} \mathbf{S} &= (\mathbf{I}_C \otimes \mathbf{U})^\dagger \mathbf{\Gamma} (\mathbf{I}_C \otimes \mathbf{U}) \\ &\approx \mathbf{H}^{-1} \otimes \mathbf{I}_N + \delta^{-1} \sum_{q=1}^Q (\boldsymbol{\beta}_q \boldsymbol{\beta}_q^\dagger) \otimes \boldsymbol{\Lambda}_{\tilde{\mathbf{K}}_q}. \end{aligned} \quad (7)$$

To obtain this result, the property of Kronecker products  $(\mathbf{A}_1 \otimes \mathbf{B}_1)(\mathbf{A}_2 \otimes \mathbf{B}_2) = (\mathbf{A}_1 \mathbf{A}_2) \otimes (\mathbf{B}_1 \mathbf{B}_2)$  was used, leaving the additive Gaussian noise term  $\mathbf{H}^{-1} \otimes \mathbf{I}_N$  untouched (since  $\mathbf{U}^\dagger \mathbf{U} = \mathbf{I}_N$ ) and replacing each  $\mathbf{K}_q$  with its spectral density,  $\delta^{-1} \boldsymbol{\Lambda}_{\tilde{\mathbf{K}}_q}$ .

One important comment pertains to the power spectral density along the diagonal of  $\boldsymbol{\Lambda}_{\tilde{\mathbf{K}}_q}$ . While the Fourier transform of any real data  $\mathbf{y}^r$  results in a symmetric spectral density, the Fourier transform of circularly symmetric data  $\mathbf{y}$  results in a spectral density that equals zero for half of the spectrum. Therefore, elements along the diagonal of  $\boldsymbol{\Lambda}_{\tilde{\mathbf{K}}_q}$  will equal zero for half the spectrum, i.e., the spectral density will contain only white noise for  $\boldsymbol{\omega} = \frac{2\pi}{N\delta} [-\lfloor \frac{N-1}{2} \rfloor, \dots, -1]$ .
